# Supplementary material for: In Vitro Disease Modeling of Hermansky-Pudlak Syndrome Type 2 Using Human Induced Pluripotent Stem Cell-Derived Alveolar Organoids
Source: PubMed Central journal article supplement (PMC6409438; doi:10.1016/j.stemcr.2019.01.014), 2019-02-14
Supplement: mmc1.pdf [file mmc1.pdf]

Stem Cell Reports, Volume 12

## Supplemental Information

### ***In Vitro* Disease Modeling of Hermansky-Pudlak Syndrome Type 2 Using Human Induced Pluripotent Stem Cell-Derived Alveolar Organoids**

**Yohei Korogi, Shimpei Gotoh, Satoshi Ikeo, Yuki Yamamoto, Naoyuki Sone, Koji Tamai, Satoshi Konishi, Tadao Nagasaki, Hisako Matsumoto, Isao Ito, Toyofumi F. Chen-Yoshikawa, Hiroshi Date, Masatoshi Hagiwara, Isao Asaka, Akitsu Hotta, Michiaki Mishima, and Toyohiro Hirai**

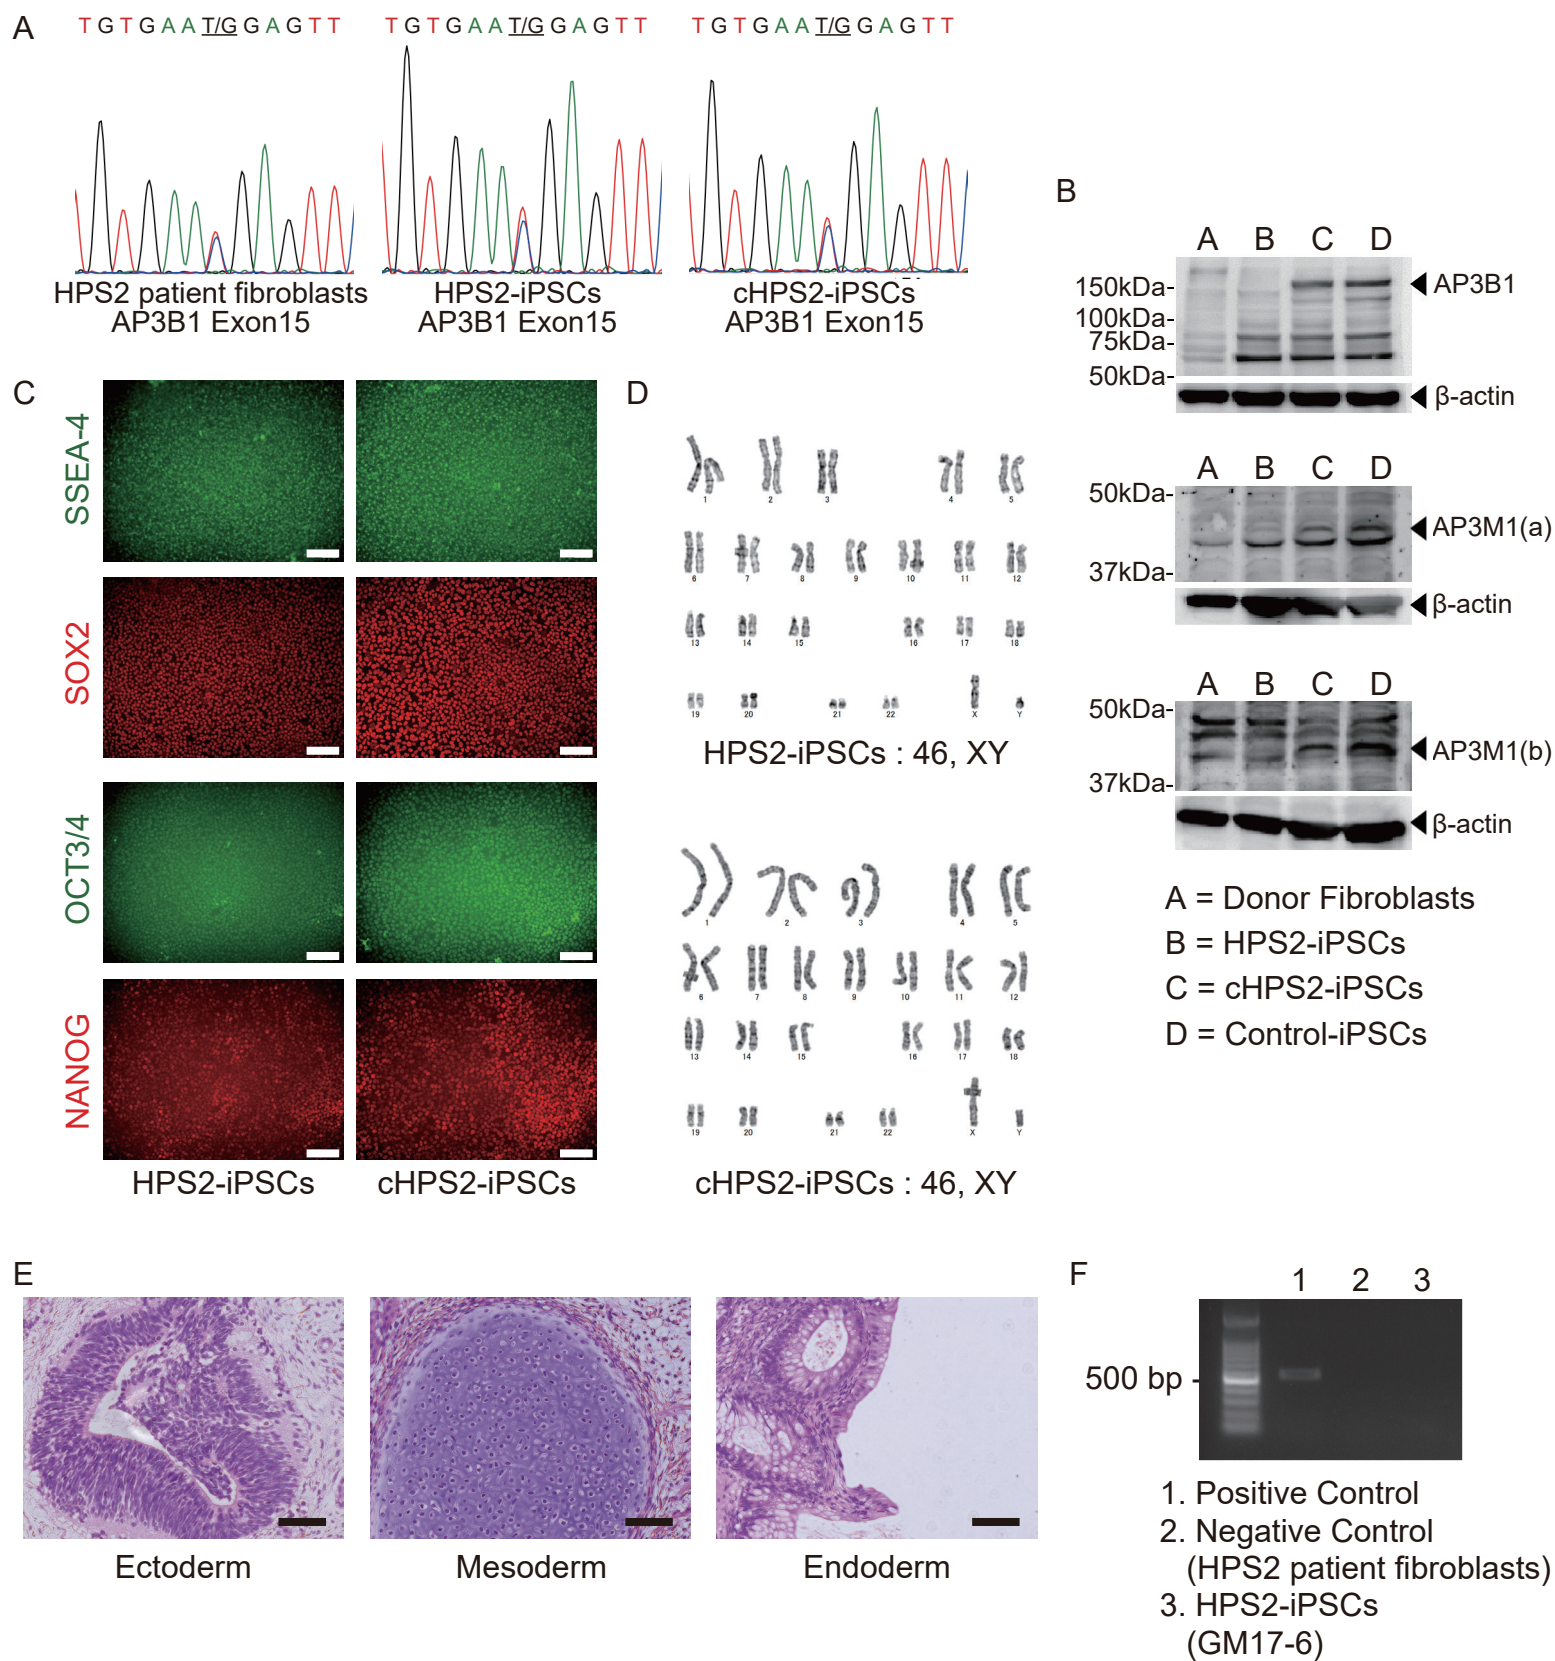

**Figure S1. Generation of HPS2-iPSCs and cHPS2-iPSCs, Related to Figure 1.**

(A) Sequence data of exon 15 in donor fibroblasts, HPS2-iPSCs and cHPS2-iPSCs. The mutation in exon 15 was not corrected in cHPS2-iPSCs. (B) Western blotting analyses of AP3B1 and AP3M1. AP3M1 was analyzed with two primary antibodies ((a) NBP1-76589 and (b) NBP2-27068). 201B7 iPSCs were used for control iPSCs. (C) IF staining of undifferentiated markers SSEA-4, SOX2, OCT3/4 and NANOG in HPS2-iPSCs and cHPS2-iPSCs. Scale bars, 100 μm. (D) The G-banding analysis of the karyotypes of HPS2-iPSCs and cHPS2-iPSCs. (E) Hematoxylin-eosin staining of teratoma derived from HPS2-iPSCs in immunodeficient mice. The three panels show ectoderm (neural cells), mesoderm (cartilage), and endoderm (gland) tissues. Scale bars, 100 μm. (F) The PCR to detect the integration of reprogramming vectors in genomic DNA. PCR products were not detected in HPS2-iPSCs.

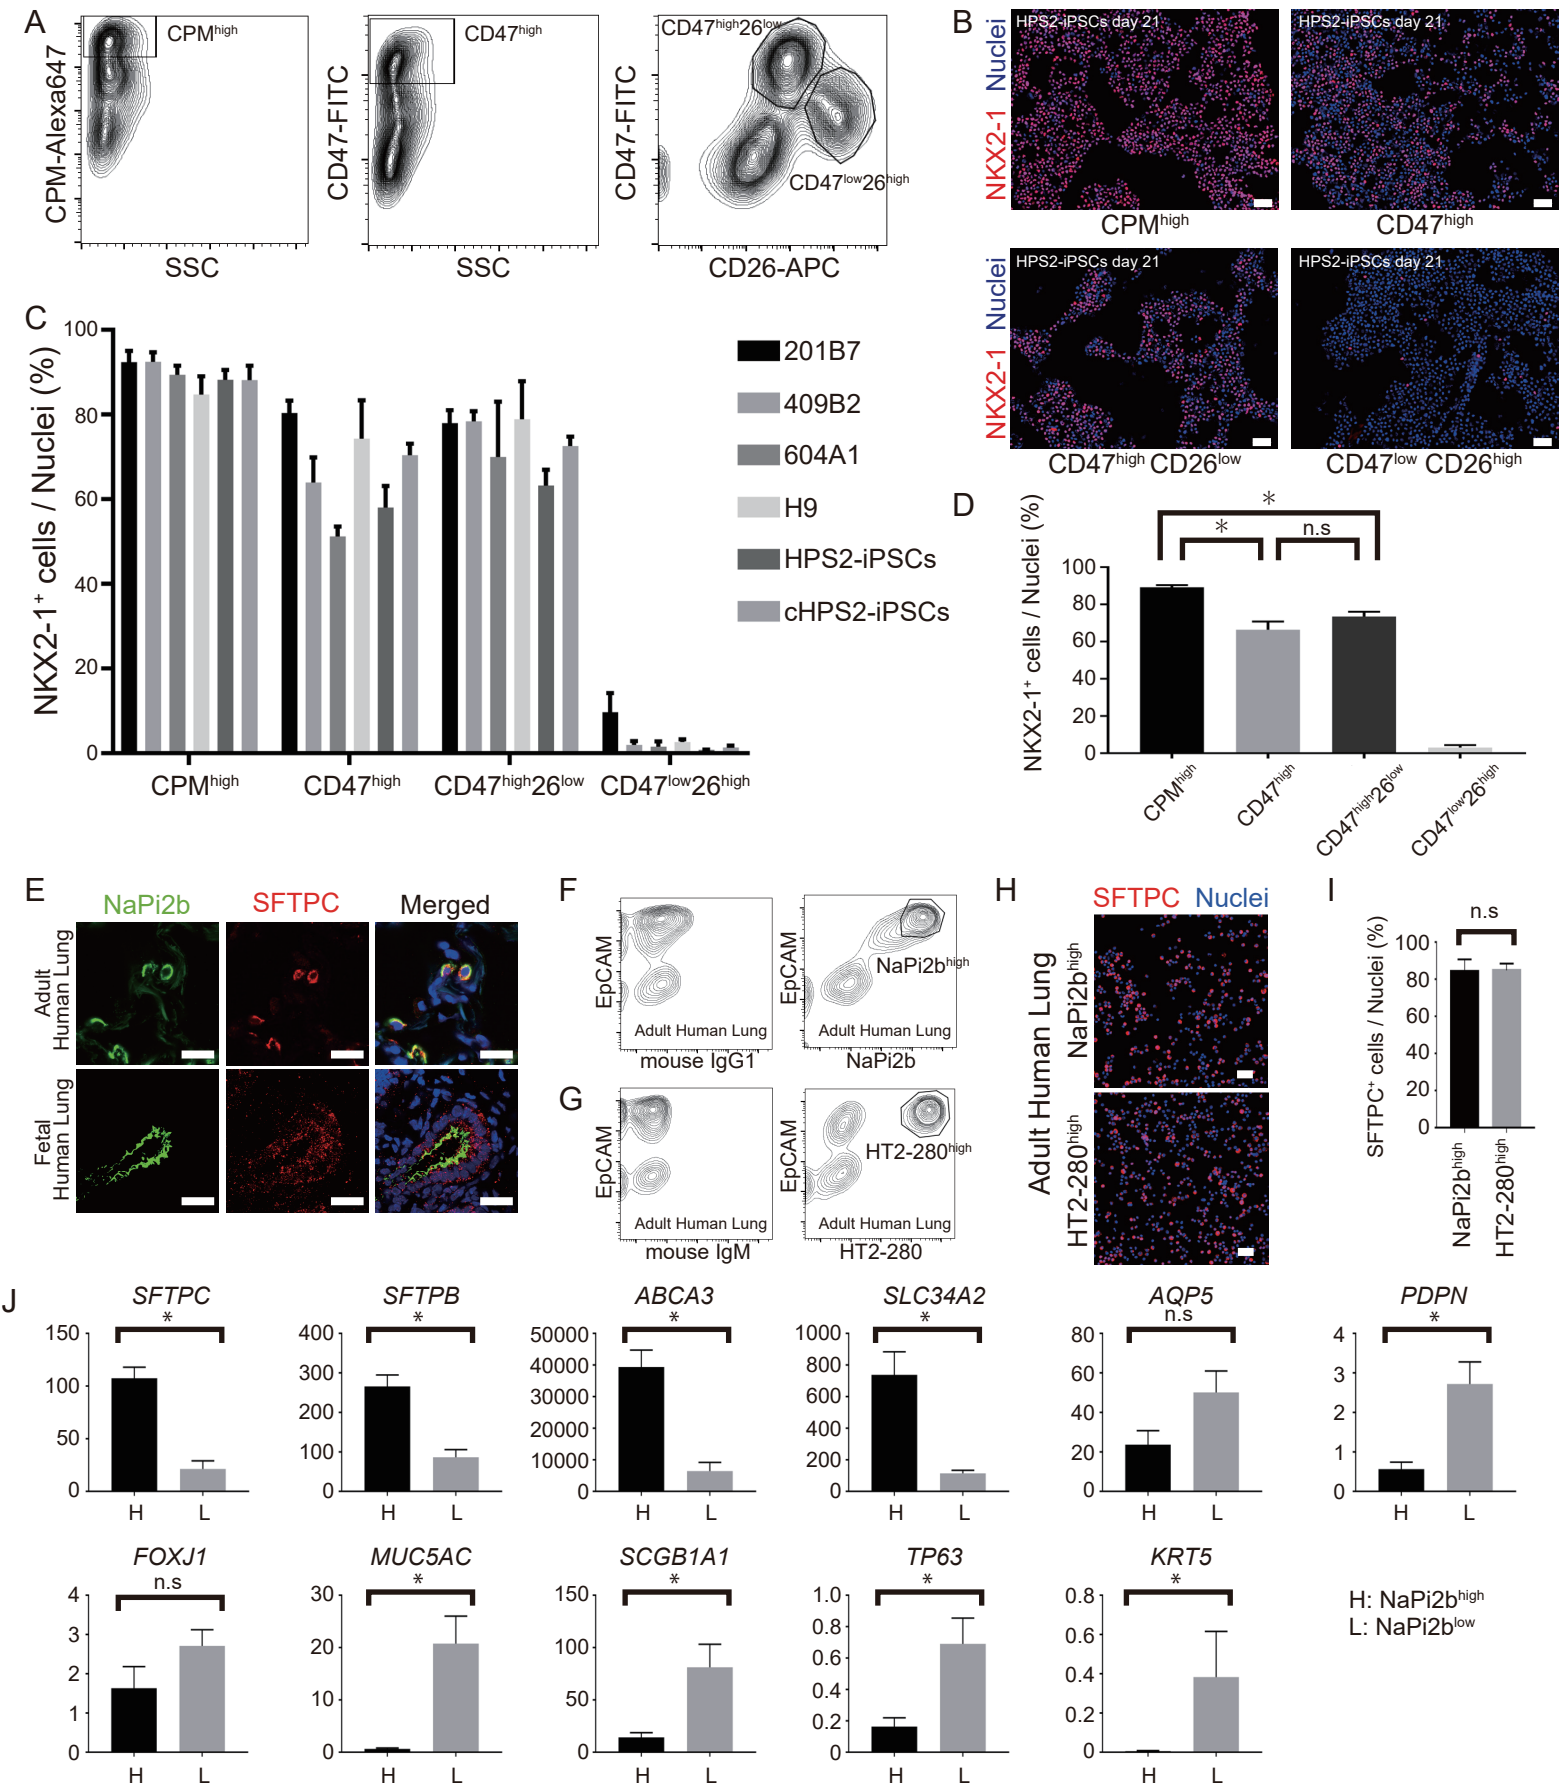

**Figure S2. Validation of Methods of Isolating NKX2-1<sup>+</sup> Cells and Passaging of AT2 Cells Based on the NaPi2b Expression, Related to Figure 2.**

(A) Flow cytometric analyses of iPSC-derived lung progenitor cells on day 21. The gating of CPM<sup>high</sup>, CD47<sup>high</sup>, CD47<sup>high</sup>CD26<sup>low</sup> and CD47<sup>low</sup>CD26<sup>high</sup> are shown. (B) IF staining of cytopsin samples of each cell population with anti-NKX2-1 antibody. Scale bars, 50 $\mu$ m. (C, D) The quantitative comparison of the proportion of NKX2-1<sup>+</sup> cells (mean  $\pm$  S.E.M., n = 3 for (C) and n = 18 for (D), 3 independent experiments). A two-way ANOVA with Tukey's multiple comparisons test was used. \*p < 0.05. n.s., not significant. (E) Confocal IF staining of adult and fetal human lung tissues with anti-NaPi2b and anti-SFTPC antibodies. Scale bars, 25  $\mu$ m. (F, G) Flow cytometric analyses of adult human lung. CD45-negative cells are plotted and the gating of NaPi2b<sup>high</sup> and HT2-280<sup>high</sup> is shown. (H) IF staining of cytopsin samples isolated from adult human lung. Scale bars, 50  $\mu$ m. (I) The proportion of SFTPC<sup>+</sup> cells in NaPi2b<sup>high</sup> and HT2-280<sup>high</sup> cell population (mean  $\pm$  S.E.M., n = 3 donors). The Mann-Whitney test was used. n.s., not significant. (J) The transcript levels of lineage-specific markers of the NaPi2b<sup>high</sup> and NaPi2b<sup>low</sup> population from adult human lung (mean  $\pm$  S.E.M., n = 4 donors). The Mann-Whitney test was used. \*p < 0.05. n.s., not significant.



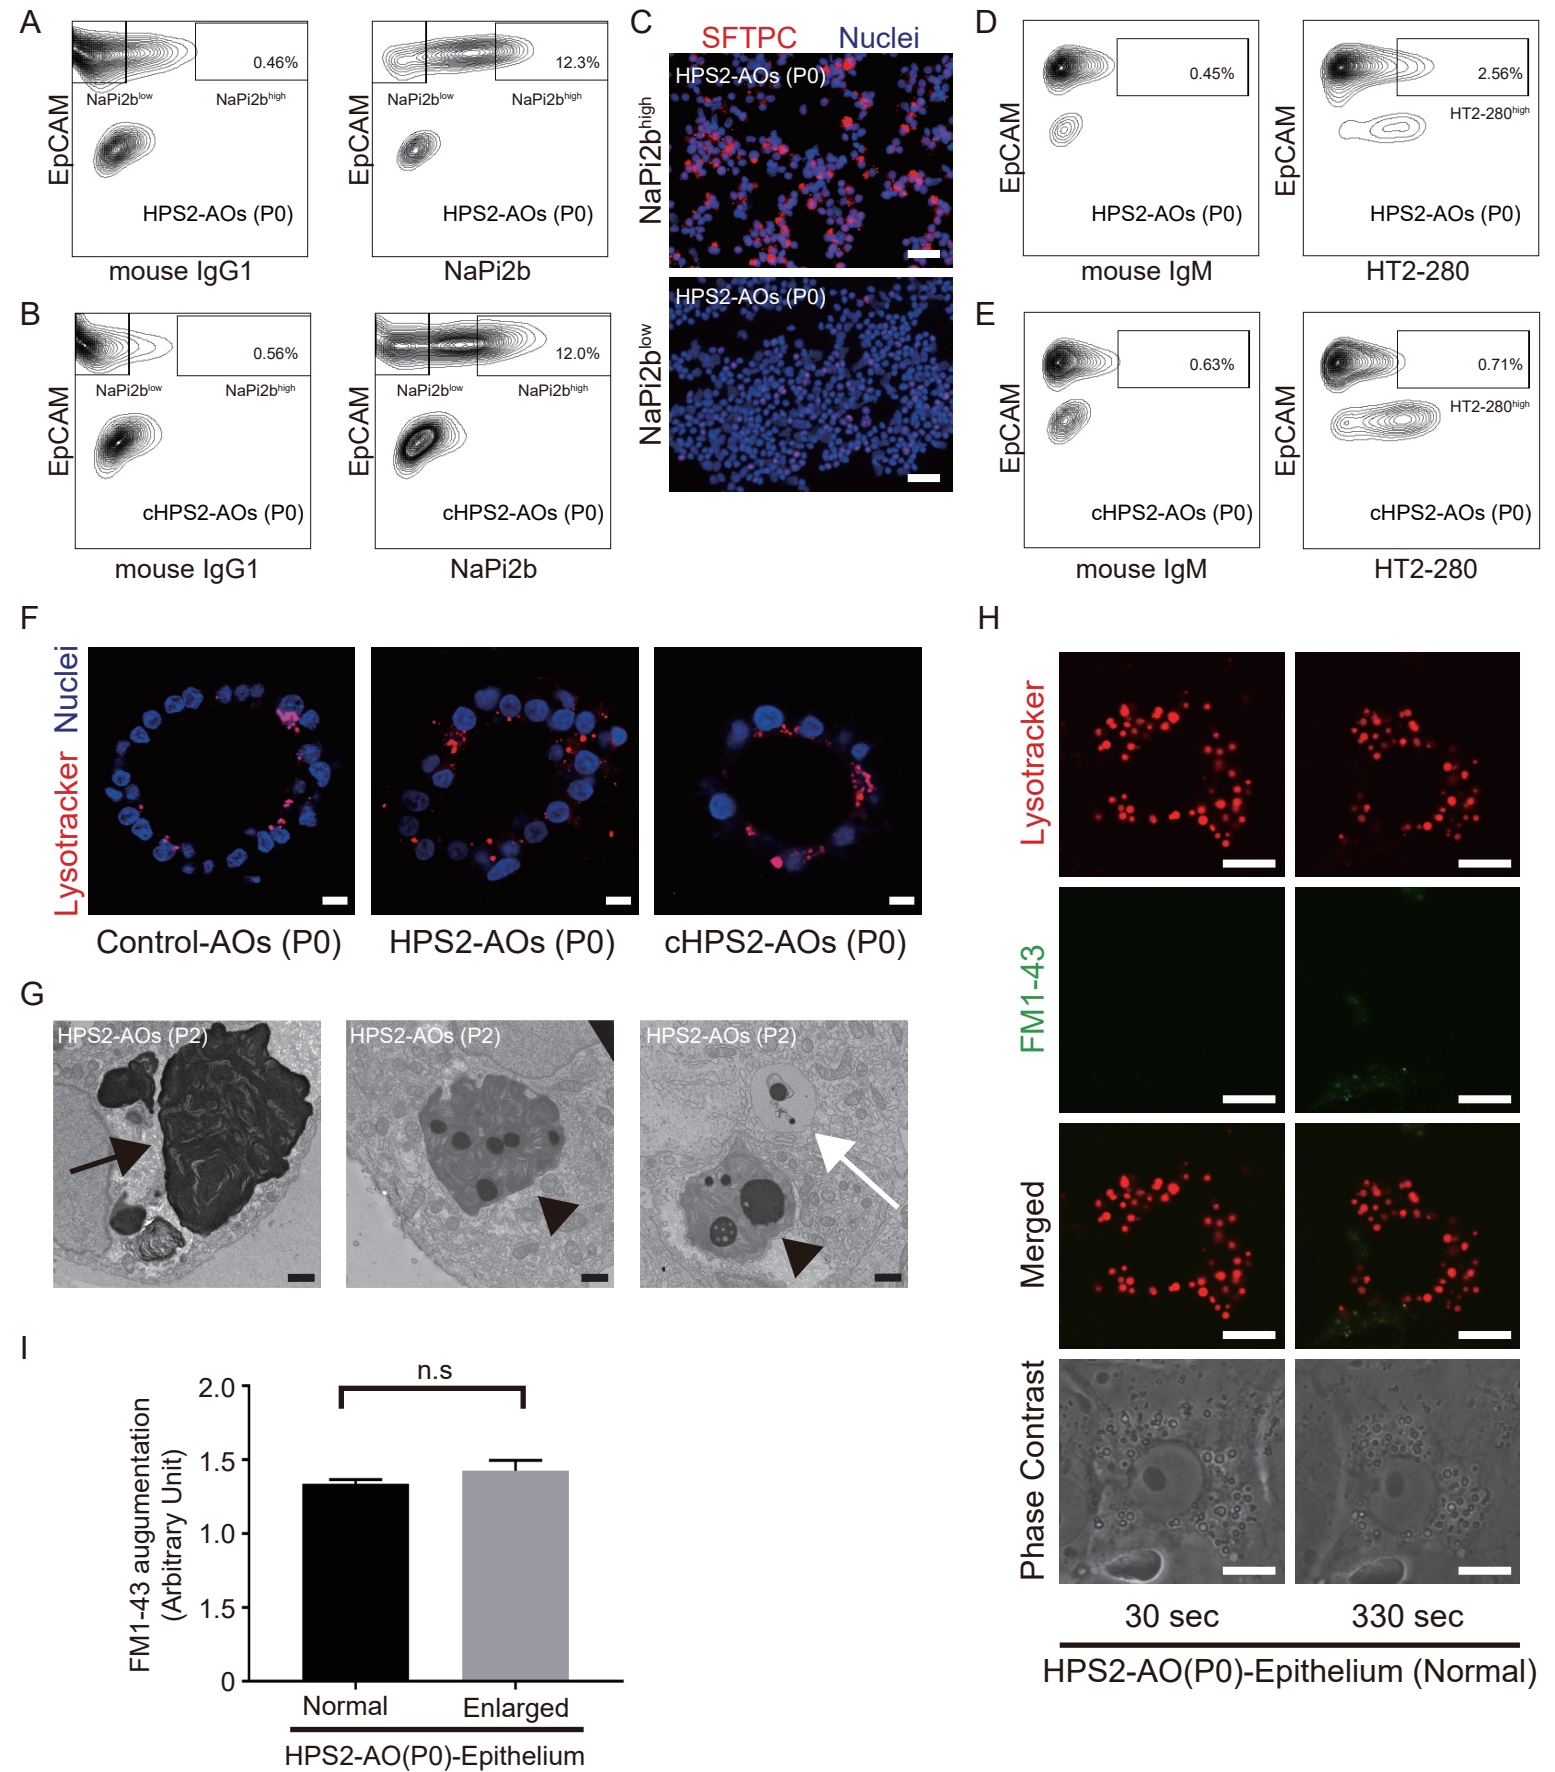

**Table S1. Predicted off-target sites for CRISPR-sgRNA, Related to Figure 1.**

| chromosome          | strand | start     | end       | sequence                  |
|---------------------|--------|-----------|-----------|---------------------------|
| chr3                | +      | 85269952  | 85269972  | CGTTT--ACAGGCAAATAATGG    |
| chr4                | +      | 84242401  | 84242422  | AGTTTAAAC-GTCAAATAATGG    |
| chr5                | +      | 122400128 | 122400150 | GGTATAGACAGGCAAACAATGG    |
| chr6                | +      | 30393163  | 30393185  | GGTTTATAA-AAGCAAATAATGG   |
| chr6                | +      | 60699704  | 60699726  | GGATTAAATAGTCAAATAATGG    |
| chr6                | +      | 101860608 | 101860628 | GGTCT-AACAGGCAAATAA-GG    |
| chr6                | +      | 144457237 | 144457260 | GGTTTAAAGAGGCAAATGAATGG   |
| chr6                | +      | 152250503 | 152250524 | GGTCTAAA-AAGCAAATAATGG    |
| chr6_GL000250v2_alt | +      | 1722659   | 1722681   | GGTTTATAA-AAGCAAATAATGG   |
| chr6_GL000251v2_alt | +      | 1872847   | 1872869   | GGTTTATAA-AAGCAAATAATGG   |
| chr6_GL000252v2_alt | +      | 1649013   | 1649035   | GGTTTATAA-AAGCAAATAATGG   |
| chr6_GL000253v2_alt | +      | 1703400   | 1703422   | GGTTTATAA-AAGCAAATAATGG   |
| chr6_GL000254v2_alt | +      | 1737213   | 1737235   | GGTTTATAA-AAGCAAATAATGG   |
| chr6_GL000255v2_alt | +      | 1648248   | 1648270   | GGTTTATAA-AAGCAAATAATGG   |
| chr6_GL000256v2_alt | +      | 1691623   | 1691645   | GGTTTATAA-AAGCAAATAATGG   |
| chr7                | +      | 3678866   | 3678887   | GGTATCAACAGGCAAATAAT-G    |
| chr7                | +      | 8542826   | 8542847   | AGTTTACACAGGCAAATAAT-G    |
| chr9                | +      | 84293388  | 84293408  | GGTTTAAACAGG--AAATTATGG   |
| chr9                | +      | 98542216  | 98542237  | GGTTTAAAAATGCAAATAA-GG    |
| chr9                | +      | 99984208  | 99984229  | GGTTT-TATAGGCAAATAATGG    |
| chr9                | +      | 112715180 | 112715200 | GGTTTAAA-AGACAAA-AATGG    |
| chr10               | +      | 73652954  | 73652976  | GGTTCAAACA-GCAAATAATGG    |
| chr10               | +      | 102727399 | 102727422 | GGTTTAAACAGGCAGGAAAT-ATGG |
| chr11               | +      | 119514483 | 119514505 | TGTTAAAAGAGGCAAATAATGG    |
| chr12               | +      | 130173993 | 130174015 | TGTTAAAACAGACAAAATAATGG   |
| chr16               | +      | 83854456  | 83854477  | GGTTT-AATAGGCAAAGAATGG    |
| chr21               | +      | 32070464  | 32070483  | GGTTTAAACA-GCAAAT-AT-G    |
| chr21               | +      | 34916634  | 34916654  | GGTTTAGACAGGC-AAA-AATGG   |
| chrX                | +      | 24881839  | 24881860  | GGTGAAAACAGGCAAAT-ATGG    |
| chrX                | +      | 96805068  | 96805091  | GGTTAATATAGGCAAATAATGG    |
| chrY                | +      | 11502526  | 11502547  | GGATTAAACAGG-AAAAAATGG    |
| chr1                | -      | 61652206  | 61652227  | GC-TTATTTTCTGTTAAACC      |
| chr1                | -      | 152893492 | 152893511 | CCATTATTTG-CT-TTT-AACC    |
| chr2                | -      | 15325113  | 15325137  | CCATTATTTGCCTTTTTGTAAACC  |
| chr2                | -      | 124743782 | 124743803 | CCATTTTTTTCTG-TTAAACC     |
| chr2                | -      | 150131432 | 150131453 | CCATTTATTT-CCTGTTAAA-C    |
| chr2                | -      | 199174432 | 199174452 | CCATT-TTTTACCT-TTAAACC    |
| chr3                | -      | 27411420  | 27411440  | CCATTATTT-CCT-TTAAAGC     |

|       |   |           |           |                          |
|-------|---|-----------|-----------|--------------------------|
| chr3  | - | 70108850  | 70108870  | CAATT-TTTTG-CTGTTTAAACC  |
| chr4  | - | 3013664   | 3013684   | CCTTTATTTTG-CTGTTTAAA-C  |
| chr4  | - | 20408383  | 20408405  | CCATTAATTTGTCTGTTTGAACC  |
| chr5  | - | 92717234  | 92717254  | CCA-T-TTTTGCCTGTTTATACC  |
| chr6  | - | 83994041  | 83994063  | CCTTTCTTTTTCCTGTTTAAACC  |
| chr6  | - | 147566614 | 147566637 | CAATTATTTTGCCAGGTTTAAACC |
| chr6  | - | 163497336 | 163497357 | CAATTATTTTG-CTGTTTAAAAC  |
| chr7  | - | 102818353 | 102818375 | ACATTATTTAACCTGTTTAAACC  |
| chr7  | - | 121948701 | 121948722 | CCATTATTTTG-TTATTTAAACC  |
| chr8  | - | 135459209 | 135459230 | CCAGT-TTTTGCCTGTTTCAACC  |
| chr10 | - | 11548921  | 11548940  | CCATTA-TTT-CCT-TTTAAACC  |
| chr10 | - | 21218346  | 21218368  | TCTTTAATTTGCCTGTTTAAACC  |
| chr10 | - | 23130755  | 23130775  | CCATTATTTTCGCCTG-TTAAA-C |
| chr12 | - | 89207482  | 89207504  | CCATTATTTTTCCTATTTAAAAC  |
| chr13 | - | 45752101  | 45752123  | CCATTATTTTGCCTGTTTGTCC   |
| chr13 | - | 95785431  | 95785452  | TCATTATTATGCCT-TTTAAACC  |
| chr17 | - | 5432517   | 5432538   | TAATTATTTT-CCTGTTTAAACC  |
| chr17 | - | 60139533  | 60139553  | CCGTTATTTTGCCT-TTT-AACC  |
| chrX  | - | 14360143  | 14360164  | CCTTTCTTTTGCCTG-TTAAACC  |
| chrX  | - | 88375144  | 88375165  | TCTTTATTTTGCCT-TTTAAACC  |

**Table S2. Antibodies used in the present study. Related to Figures 1-4 and S1-3.**

| Species                                 | Antibodies                        | Company                                   | Catalog No./ Clone  | Dilution |
|-----------------------------------------|-----------------------------------|-------------------------------------------|---------------------|----------|
| For isolating NKX2-1 <sup>+</sup> cells |                                   |                                           |                     |          |
| mouse                                   | Anti-CPM                          | Abcam                                     | ab49278/1C2         | 1:200    |
| mouse                                   | Anti-CPM                          | Wako                                      | 014-27501           | 1:200    |
| donkey                                  | Anti-mouse IgG- Alexa Fluor 647   | Thermo Fisher Scientific                  | A-31571             | 1:200    |
| mouse                                   | Anti-CD47-FITC                    | BioLegend                                 | 323106/CC2C6        | 1:20     |
| mouse                                   | Anti-CD26-APC                     | BioLegend                                 | 302710/BA5b         | 1:20     |
| mouse                                   | Mouse IgG1-kappa-FITC             | BD Pharmingen                             | 555748/MOPC-21      | 1:5      |
| mouse                                   | Mouse IgG2a-kappa-APC             | BD Pharmingen                             | 550882/G155-178     | 1:20     |
| For CD63 analysis                       |                                   |                                           |                     |          |
| mouse                                   | Anti-CD63- Alexa Fluor 647        | BioLegend                                 | 353016/H5C6         | 1:20     |
| mouse                                   | Mouse IgG1 kappa- Alexa Fluor 647 | BioLegend                                 | 400130/MOPC-21      | 1:20     |
| For passage of AOs by MX35              |                                   |                                           |                     |          |
| mouse                                   | Anti-NaPi2b                       | kindly provided by Dr. Gerd Ritter (MX35) |                     | 1:100    |
| mouse                                   | Mouse IgG1                        | Sigma-Aldrich                             | M5284/MOPC21        | 1:100    |
| goat                                    | Anti-EpCAM                        | R&D systems                               | AF960               | 1:100    |
| donkey                                  | Anti-mouse IgG Alexa Fluor 647    | Thermo Fisher Scientific                  | A-31571             | 1:200    |
| donkey                                  | Anti-goat IgG Alexa Fluor 488     | Thermo Fisher Scientific                  | A-11055             | 1:200    |
| For isolation of adult human AT2 cells  |                                   |                                           |                     |          |
| mouse                                   | Anti-EpCAM                        | BioLegend                                 | 324202/9C4          | 1:100    |
| mouse                                   | Mouse IgG2b kappa                 | Thermo Fisher Scientific                  | 14-4732-82/ eBMG2b  | 1:100    |
| mouse                                   | Anti-CD45-VioBlue                 | Miltenyi Biotec                           | 130-092-880/5B1     | 1:100    |
| mouse                                   | Mouse IgG2a-VioBlue               | Miltenyi Biotec                           | 130-098-898/ S43.10 | 1:100    |
| mouse                                   | Anti-NaPi2b                       | kindly provided by Dr. Gerd Ritter (MX35) |                     | 1:100    |
| mouse                                   | Mouse IgG1                        | Sigma-Aldrich                             | M5284/MOPC21        | 1:100    |
| mouse                                   | HT2-280                           | Terrace Biotech                           | TB-27AHT2-280       | 1:100    |
| mouse                                   | Mouse IgM                         | Sigma-Aldrich                             | M5909/MOPC104E      | 1:100    |
| goat                                    | Anti-mouse IgG2b Alexa Fluor 488  | Thermo Fisher Scientific                  | A-21141             | 1:200    |
| goat                                    | Anti-mouse IgG1 Alexa Fluor 647   | Thermo Fisher Scientific                  | A-21240             | 1:200    |
| donkey                                  | Anti-mouse IgM Alexa Fluor 647    | Jackson ImmunoResearch                    | 715-605-140         | 1:50     |
| FM1-43 augmentation assay               |                                   |                                           |                     |          |
| mouse                                   | Anti-EpCAM                        | Santa Cruz Biotechnology                  | sc-66020/EBA-1      | 1:100    |
| rat                                     | Anti-mouse IgG1-microbeads        | Miltenyi Biotec                           | 130-047-101         | 1:5      |
| For immunofluorescence staining         |                                   |                                           |                     |          |
| goat                                    | Anti-β3A subunit (AP3B1)          | abcam                                     | AB118584            | 1:100    |
| rabbit                                  | Anti-SFTPC                        | Santa Cruz Biotechnology                  | FL-197              | 1:100    |
| mouse                                   | Anti-NaPi2b                       | kindly provided by Dr. Gerd Ritter (MX35) |                     | 1:100    |
| rabbit                                  | Anti-ABCA3                        | kindly provided by Prof. Nobuya Inagaki   |                     | 1:500    |
| mouse                                   | Anti-DCLAMP                       | Beckman Coulter                           | IM3448/104.G4       | 1:100    |

|                      |                                  |                          |                  |        |
|----------------------|----------------------------------|--------------------------|------------------|--------|
| rabbit               | Anti-NKX2-1                      | abcam                    | ab76013/EP1584Y  | 1:500  |
| mouse                | Anti-SSEA-4                      | BioLegend                | 330401/MC-813-70 | 1:100  |
| rabbit               | Anti-SOX2                        | Millipore                | AB5603           | 1:500  |
| mouse                | Anti-OCT3/4                      | Santa Cruz Biotechnology | sc-5279/C-10     | 1:100  |
| rabbit               | Anti-NANOG                       | ReproCELL                | RCAB004P-F       | 1:100  |
| donkey               | Anti-rabbit IgG-Cy3              | Jackson ImmunoResearch   | 711-165-152      | 1:500  |
| donkey               | Anti-mouse IgG-Alexa Fluor 488   | Thermo Fisher Scientific | A-21202          | 1:500  |
| donkey               | Anti-goat IgG-Alexa Fluor 488    | Thermo Fisher Scientific | A-11055          | 1:500  |
| For Western blotting |                                  |                          |                  |        |
| rabbit               | Anti- $\beta$ 3A subunit (AP3B1) | Proteintech              | 13384-1-AP       | 1:500  |
| rabbit               | Anti- $\mu$ subunit (AP3M1)      | Novus Biologicals        | NBP1-76589       | 1:1000 |
| rabbit               | Anti- $\mu$ subunit (AP3M1)      | Novus Biologicals        | NBP2-27068       | 1:1000 |
| mouse                | Anti- $\beta$ -actin             | Sigma-Aldrich            | A2228/AC-74      | 1:5000 |
| pig                  | Anti-rabbit immunoglobulins-HRP  | Dako                     | P0399            | 1:1000 |



**Table S3. Content of the mediums. Related to Figures 2 and 4.**

|                          | Anteriorization medium                                                                                                                                        | Ventralization medium                                                                                                                                                                                                                                                                                              | CFKD preconditioning medium                                                      |
|--------------------------|---------------------------------------------------------------------------------------------------------------------------------------------------------------|--------------------------------------------------------------------------------------------------------------------------------------------------------------------------------------------------------------------------------------------------------------------------------------------------------------------|----------------------------------------------------------------------------------|
| Basal Medium             | DMEM / F12<br>Glutamax<br>B27 supplement (2 %)<br>L-ascorbic acid (0.05 mg/ml)<br>monothioglycerol (0.4 mM)<br>Penicillin / Streptomycin (50 U/ml)            |                                                                                                                                                                                                                                                                                                                    |                                                                                  |
| Chemicals /<br>Cytokines | Noggin (100 ng/ml)<br>SB431542 (10 $\mu$ M)                                                                                                                   | ATRA (depends on cell lines)<br>BMP4 (20 ng/ml)<br>CHIR99021 (depends on cell lines)<br>[Concentrations of ATRA/CHIR99021]<br>201B7: 0.05 $\mu$ M/3.0 $\mu$ M<br>409B2: 0.1 $\mu$ M/2.5 $\mu$ M<br>604A1: 1.0 $\mu$ M/2.5 $\mu$ M<br>H9: 0.5 $\mu$ M/3.5 $\mu$ M<br>HPS2- and cHPS2-iPSCs: 1.0 $\mu$ M/3.5 $\mu$ M | CHIR99021 (3 $\mu$ M)<br>FGF10 (10 ng/ml)<br>KGF (10 ng/ml)<br>DAPT (20 $\mu$ M) |
|                          | Alveolarization medium                                                                                                                                        | Replating medium                                                                                                                                                                                                                                                                                                   |                                                                                  |
| Basal Medium             | Ham's F12<br>B27 supplement (1 %)<br>BSA (0.25 %)<br>HEPES (15 mM)<br>CaCl <sub>2</sub> (0.8 mM)<br>ITS premix (0.1 %)<br>Penicillin / Streptomycin (50 U/ml) |                                                                                                                                                                                                                                                                                                                    |                                                                                  |
| Chemicals /<br>Cytokines | Dexamethasone (50 nM)<br>IBMX (100 $\mu$ M)<br>KGF (10 ng/ml)<br>8-Br-cAMP (100 $\mu$ M)                                                                      | Dexamethasone (50 nM)<br>IBMX (100 $\mu$ M)<br>KGF (10 ng/ml)<br>CHIR99021 (3 $\mu$ M)<br>SB431542 (10 $\mu$ M)                                                                                                                                                                                                    |                                                                                  |

**Table S4. Primers used in the present study. Related to Figures 1-2 and S2.**

| Gene           | Forward                 | Reverse                | Size |
|----------------|-------------------------|------------------------|------|
| <i>ABCA3</i>   | TTCCTTCAGCTTCATGGTCAG   | TGGCTCAGAGTCATCCAGTTG  | 136  |
| <i>ACTA2</i>   | GGGTGACGAAGCACAGAGCA    | CTTCAGGGGCAACACGAAGC   | 137  |
| <i>AGER</i>    | GCCACTGGTGCTGAAGTGTA    | TGGTCTCCTTTCCATTCCTG   | 191  |
| <i>AP3B1</i>   | GAAGAATGCAGCCCATGCAA    | TGCCAGCTACCAATGTGCTT   | 116  |
| <i>AQP5</i>    | CTGTCCATTGGCCTGTCTGTC   | GGCTCATACTGCCTTTGATG   | 248  |
| <i>FOXJ1</i>   | CCTGTGCGCCATCTACAAGT    | AGACAGGTTGTGGCGGATT    | 94   |
| <i>KRT5</i>    | GAGCTGAGAAACATGCAGGA    | TCTCAGCAGTGGTACGCTTG   | 82   |
| <i>MUC5AC</i>  | CATCTGCCAGCTGATTCTGA    | AAGACGCAGCCCTCATAGAA   | 129  |
| <i>PDPN</i>    | TCCAGGAACCAGCGAAGAC     | CGTGGACTGTGCTTTCTGA    | 119  |
| <i>SCGB1A1</i> | CACCATGAAACTCGCTGTCAC   | AGTTCCATGGCAGCCTCATAAC | 147  |
| <i>SFTP B</i>  | GAGCCGATGACCTATGCCAAG   | AGCAGCTTCAAGGGGAGGA    | 133  |
| <i>SFTP C</i>  | GCAAAGAGGTCCTGATGGAG    | TGTTTCTGGCTCATGTGGAG   | 178  |
| <i>SLC34A2</i> | TCGCCACTGTCATCAAGAAG    | CTCTGTACGATGAAGGTCATGC | 112  |
| <i>SNAIL</i>   | AATCCAGAGTTTACCTTCCAGCA | TCCAGATGAGCATTGGCAG    | 110  |
| <i>TGFB1</i>   | GGAAATTGAGGGCTTTCGCC    | CCGGTAGTGAACCCGTTGAT   | 90   |
| <i>TP63</i>    | ACTGCCAAATTGCAAAGACA    | TGACTAGGAGGGGCAATCTG   | 184  |
| <i>TWIST</i>   | TCTCGGTCTGGAGGATGGAG    | AATGACATCTAGGTCTCCGGC  | 100  |
| <i>β-ACTIN</i> | CAATGTGGCCGAGGACTTTG    | CATTCTCCTTAGAGAGAAGTGG | 126  |

## SUPPLEMENTAL EXPERIMENTAL PROCEDURES

### Generation of human iPSCs generation and maintenance of human PSCs

For the generation of HPS2-iPSCs, GM17890 HPS2 fibroblasts (NIGMS Human Genetic Cell Repository, Coriell Institute for Medical Research) were reprogrammed to iPSCs as previously reported (Okita et al., 2011). Human cDNAs of reprogramming factors were transduced into patient fibroblasts with episomal vectors (SOX2, KLF4, OCT3/4, L-MYC, LIN28, short hairpin RNA for p53). Several days after transduction, fibroblasts were harvested and replated on mitomycin C-treated STO feeder layer (DS Pharma Biomedical). The next day, the medium was changed to primate ES cell medium (Reprocell) supplemented with human FGF-2 (4 ng/ml) (Wako or DS Pharma Biomedical). The medium was then changed every other day. Thirty days after transduction, the iPSC colonies were picked up.

For the teratoma formation assay, undifferentiated HPS-iPSCs were harvested and re-suspended in DMEM/F12 supplemented with 10  $\mu$ M of Y-27632 (LC laboratories). Approximately  $5 \times 10^5$  cells were injected into a testis of 8-week-old SCID mice (Clea Japan, Inc.). At 10-12 weeks after transplantation, the mice were sacrificed, and tumors were harvested and fixed with Mildform 10N (Wako) and embedded in paraffin. The sections were stained with hematoxylin and eosin.

For the maintenance of H9 human embryonic stem cells (hESCs), the cells were cultured on mitomycin C-treated STO feeder cells in Primate ES medium supplemented with 4 ng/ml human FGF-2 and 50 U/ml penicillin–streptomycin (Life Technologies). HPS2-iPSCs (GM17-6), cHPS2-iPSCs (res69-5) and control iPSCs (201B7, 409B2 and 604A1) were cultured in Essential 8 medium (Gibco) without feeder cells and used for differentiation studies within 20 passages.

### Gene correction of HPS2-iPSCs

The donor template was designed to have normal exon 18. Since AP3B1 is expressed ubiquitously, the splicing acceptor was placed upstream of the neomycin resistant gene in the donor template. HPS2-iPSCs were pretreated with Y-27632 at 10  $\mu$ M for at least 1 h before electroporation. The cells were washed with PBS and treated with CTK solution for 1–3 min at room temperature (RT) to remove feeders and then washed with PBS twice. Next, the iPSCs were treated with accutase for 10 min at 37°C, dissociated into single cells by pipetting, and neutralized with culture medium. We electroporated 10  $\mu$ g of Cas9 and sgRNA expression vectors (5  $\mu$ g for Cas9 and 5  $\mu$ g for sgRNA) and 5  $\mu$ g of donor plasmid into  $1 \times 10^6$  cells using a NEPA 21 electroporator (poring pulse: pulse voltage, 125 V; pulse width, 5 ms; pulse number, 2; Nepagene). Cells were plated onto one well of a six-well plate with feeders in the presence of 10  $\mu$ M Y-27632 for 1–2 days. G418 (Gibco) selection was applied after iPSC colonies were recovered (4–5 days after transfection). The resulting neomycin-resistant colonies were dissociated into single cells and plated at 200, 500 and 1500 cells per 10-cm dish with feeders. Each subclone was screened by genomic PCR and sequencing. After establishing the knockin clones, we electroporated the cells with 10  $\mu$ g of the Cre expression vector using NEPA 21. Clone isolation was carried out and excision of the neomycin-selection cassette was confirmed by genomic PCR and sequencing.

Out of 132 isolated clones, 94 morphologically normal clones were screened for knock-in; 36 clones (27%) had the donor template at the target locus. After Cre excision, we chose a res69-5 clone for the subsequent experiments. For res69-5 clone, a total of 58 predicted off-target sites with up to 3 bp mismatches allowed (Table S1) (GGGenome; <https://gggenome.dbcls.jp/ja/>) were examined by sanger sequencing, resulting in no abnormal deletions or insertions being detected at these sites in the res69-5 cHPS2-iPSC clone.

### Western blotting

Thirty micrograms of protein in lysis buffer was loaded in each well of 10% polyacrylamide gels and electrophoresed at 100 V for 2 h. Proteins were transferred onto methanol-activated PVDF membrane (Amersham Hybond P PVDF 0.45) in transfer buffer

(20% methanol, 0% SDS) at 100 V for 1 h at 4°C. After being washed in TBS-T for 5 min, membranes were blocked with TBS-T containing 5% non-fat milk (Megmilk Snow Brand) for 1 h under agitation. Primary and secondary antibodies were diluted in TBS-T. Primary antibodies were incubated overnight and Secondary antibodies were incubated for 1 h under agitation, followed by washing with TBS-T for 5 min, three times. Signals were visualized by Clarity Western ECL Substrate (Bio-rad). The antibodies used are listed in Table S2.

### **FACS analysis**

Single cell suspension was washed with FACS buffer (1% BSA /PBS supplemented with 10  $\mu$ M Y-27632) and immunostained with primary antibodies at 4°C for 15 min. After being washed twice with FACS buffer, the cells were stained with secondary antibodies on demand at 4°C for 15 min. After being washed twice with FACS buffer, the cells were stained with propidium iodide (PI), and a FACS analysis was performed using a FACS Aria II or Aria III (BD Biosciences). The antibodies used are listed in Table S2.

### **Induction and isolation of NKX2-1<sup>+</sup> lung progenitor cells.**

The differentiation of human PSCs was performed as previously described (Gotoh et al., 2014; Konishi et al., 2016; Yamamoto et al., 2017). In brief, undifferentiated human PSCs were differentiated into definitive endodermal cells on Geltrex (Gibco)-coated plates in RPMI medium (Nacalai Tesque) containing a saturated dose of Activin A (100 ng/ml) (Peprotech), 1  $\mu$ M CHIR99021 (Axon Medchem), 2% B27 supplement (Life technologies) and 50 U/ml penicillin–streptomycin. The medium was replaced every two days. Y-27632 was supplemented on Day 0, and sodium butyrate were supplemented on Day 1, 2 and 4. During Day 6-10, the definitive endodermal cells were cultured in the anteriorization medium (Table S3), followed by switching on Day10 to the ventralization medium (Table S3) containing BMP4 (20 ng/ml) (HumanZyme) and adjusted doses of ATRA (Sigma-Aldrich)/CHIR99021 (Table S3). The optimized concentrations of ATRA/CHIR99021 for both HPS2-iPSCs (GM17-6) and cHPS2-iPSCs (res69-5) were 1.0  $\mu$ M/3.5  $\mu$ M. During Day 14-21, cells were cultured in CFKD preconditioning medium (Table S3). On Day 21, NKX2-1<sup>+</sup> lung progenitor cells were isolated using mouse anti-human CPM (Abcam or Wako) and anti-mouse IgG-Alexa647 (Invitrogen) for gating CPM<sup>high</sup> cells as previously reported (Yamamoto et al., 2017). To validate CD47/CD26-based isolation, mouse anti-human CD47-FITC (BioLegend) and mouse anti-human CD26-APC (BioLegend) were used for gating CD47<sup>high</sup> or CD47<sup>high</sup>CD26<sup>low</sup> cells. Mouse IgG1-FITC (BD Pharmingen) and mouse IgG2a-APC (BD Pharmingen) were used for isotype controls. The antibodies used are listed in Table S2.

### **AO formation**

A total of  $1.0 \times 10^4$  CPM<sup>high</sup> cells and  $5.0 \times 10^5$  human fetal lung fibroblasts were mixed in 100  $\mu$ L of alveolarization medium (Table S3) supplemented with Y-27632 (10  $\mu$ M) and 100  $\mu$ L of Matrigel (Corning; 354230) and placed on a 12-well cell culture insert (Corning). The medium in the lower chamber was changed every two days. Human fetal lung fibroblasts (17.5 weeks of gestation; DV Biologics; PP002-F-1349, lot 121109VA) were cultured in DMEM (Nacalai Tesque) supplemented with 10% fetal bovine serum and used at passage number 9 or 10.

### **AO passaging**

The duration of organoid culturing was 14 $\pm$ 1 days. AO cells were dissociated with 0.1% Trypsin-EDTA at 37 °C for 15 minutes (Gotoh et al., 2014; Yamamoto et al., 2017), washed in FACS buffer twice, and immunostained with mouse anti-NaPi2b (MX35; kindly provided by Dr. Gerd Ritter) (Yin et al, 2008) and goat anti-EpCAM (R&D Systems). Anti-mouse IgG-Alexa647 (Invitrogen) and anti-goat IgG-Alexa488 (Invitrogen) were used as secondary antibodies. NaPi2b<sup>high</sup> and NaPi2b<sup>low</sup> cell populations were then isolated by FACS Aria II or III (BD Biosciences). A total of  $1.0 \times 10^4$  NaPi2b<sup>high</sup> cells were mixed with 5.0

$\times 10^5$  human fetal lung fibroblasts in Matrigel and placed on a culture insert as described in AO formation. The antibodies used are listed in Table S2.

### **qRT-PCR**

Total RNA was extracted with a PureLink RNA mini kit (Invitrogen). cDNA was prepared from 80 ng of total RNA per sample with SuperScript III reverse transcriptase (Invitrogen), amplified by Power SYBR Green PCR Master Mix (Applied Biosystems) and quantified by QuantStudio 3 (Applied Biosystems). The gene expression was normalized to the  $\beta$ -actin expression and compared with that in control RNA of human fetal lung at 17, 18 and 22 weeks of gestation (Agilent Technologies; #540177, lot 0006055802) and was presented as the relative gene expression. The primers used in the present study are described in Table S4.

### **IF staining**

Two-dimensional culture or slide samples were fixed with 4% paraformaldehyde/PBS for 15 min and permeabilized with 0.2% Triton X-100/PBS for 15 min. After 30 min of blocking in 5% normal donkey serum/1% BSA/PBS, they were immunostained with primary and secondary antibodies for 30 min each, as previously described (Gotoh et al, 2014). In contrast, AOs were fixed with 4% paraformaldehyde/PBS for 20 min and incubated in 30% sucrose/PBS overnight. Organoids were then embedded in OCT compound (Sakura Finetek) and frozen in liquid nitrogen. The frozen organoids were sliced into 10- $\mu$ m-thick sections on slides, permeabilized and blocked as described above. They were then immunostained with primary antibodies overnight and with secondary antibodies for 1 h. Hoechst-33342 (Dojindo) was added to the secondary antibody solution in order to label nuclei. The antibodies used in the present study are listed in Table S2. For the quantitative analysis of IF imaging, images were taken by a BZ-X710 (Keyence) and quantified by Hybrid Cell Count/BZ-H3C (Keyence) from 10-15 areas. A TCS SP8 (Leica Microsystems) was used for confocal imaging, and an IX81 (Olympus) was used for other conventional IF imaging.

### **Isolation of adult human AT2 cells from lung tissues**

Human AT2 cells were isolated as previously described, with some modifications (Fujino et al., 2012; Yamamoto et al., 2017). Lung tissues were obtained from nontumorous regions of surgically resected specimens from patients with lung tumors. Samples from 3 donors (77-year-old male, 64-year-old female, 62-year-old female) were used for the cytospin analysis and 4 donors (58-year-old female, 76-year-old male, 72-year-old female, 68-year-old male) were used for the qRT-PCR. Lung tissues were mechanically minced and dissociated with Dispase II (Wako), collagenase/Dispase (Sigma-Aldrich) and DNase I (Sigma-Aldrich) for 60 min at 37°C. After being filtered through a 100- $\mu$ m mesh, the cells were treated with ACK lysing buffer (Gibco). For sorting with MX35 (anti-NaPi2b), cells were immunostained with primary antibodies of MX35, anti-human EpCAM and anti-human CD45-VioBlue and secondary antibodies of anti-mouse IgG2b-Alexa488 (Invitrogen) and anti-mouse IgG1-Alexa647 (Invitrogen). For sorting with HT2-280, HT2-280 (Terrace Biotec) and anti-mouse IgM-Alexa647 (Jackson ImmunoResearch) were used instead of MX35 and anti-mouse IgG1-Alexa 647, respectively. The antibodies and corresponding isotype controls used in the present study are listed in Table S2.

### **Electron microscopy**

Small pieces of AOs were incubated in fixative solution consisting of 2.5% glutaraldehyde, 2% paraformaldehyde, 2% osmium tetroxide, 0.1% picric acid, 4% sucrose, and 0.1M phosphate buffer (pH 7.4) on ice for 2 h. *En bloc* staining was performed in 1% uranyl acetate at RT for 1 h, dehydrated, and embedded in Epon 812, as described previously (Gotoh et al., 2014). Ultrathin sections were stained with uranyl acetate and lead citrate and analyzed by transmission electron microscopy (Hitachi; H-7650).



## Live cell imaging

AOs were stained with 10 µg/ml Hoechst 33342 and 100 nM LysoTracker Red DND-99 (Thermo Fisher Scientific; L7528) for 60 and 30 min, respectively. AOs were washed with PBS twice, placed on 35 mm glass-bottom dishes (Grainer) and examined under a FV10i-LIV confocal microscope (Olympus) under 5% CO<sub>2</sub> at 37°C. The apicobasal distribution of the LysoTracker-stained vesicles was quantified using the Image J software program (National Institutes of Health).

For the LB secretion assay, AOs were dissociated with 0.1% Trypsin-EDTA at 37°C for 15 min and stained with anti-EpCAM (Santa Cruz Biotechnology) followed by staining with anti-mouse IgG1-microbeads (Miltenyi Biotec), followed by separation using a LS column (Miltenyi Biotec). To obtain a sufficient number of cells, EpCAM<sup>+</sup> cells were used for the experiment. A total of  $3.0 \times 10^5$  EpCAM<sup>+</sup> cells were reseeded on Geltrex-coated 8-well coverglass chambers (Thermo Fisher Scientific) in replating medium (Table S3) supplemented with 10 µM of Y-27632. At  $24 \pm 12$  h after reseeding, cells were stained with LysoTracker Red DND-99 (100 nM) for 30 min, washed with PBS and given fresh replating medium. Before live cell imaging, the cells were incubated in 0.5 µM of FM1-43 (Thermo Fisher; T3163). Time-lapse imaging was then performed after the supplementation of the secretagogue cocktail prepared as stock solutions of forskolin (Dekkers et al., 2013), ATP (Haller et al., 1998), ionomycin (Neuland et al., 2014) and phorbol 12-myristate 13-acetate (PMA) (Neuland et al., 2014). The LB content secretion was quantified by calculating the FM1-43 augmentation level as “the change in the FM1-43 integral density divided by the change in the LysoTracker integral density”. For the comparison of enlarged and normal LBs in HPS2-AO, LBs of  $>4$  µm in diameter were analyzed as “enlarged”; LBs of  $\leq 4$  µm in diameter were analyzed as “normal”. Image J was used to analyze images. Z-stack images were obtained before and 60 min after stimulation with the secretagogue cocktail. LysoTracker Deep Red (Thermo Fisher Scientific; L12492) (100 nM) was used for Z-stack images.

## PC assay

A total of  $3.0 \times 10^5$  EpCAM<sup>+</sup> cells were reseeded on a 96-well flat bottom plate in replating medium (Table S3) supplemented with 10 µM of Y-27632. At  $24 \pm 12$  h after reseeding, the medium was removed and replaced with 200 µl of HBSS containing secretagogue cocktail or DMSO. After 3 hours, culture supernatant was collected. A phosphatidylcholine assay kit (Sigma-Aldrich; MAK049) was used for the quantification.

## SUPPLEMENTAL REFERENCES

Dekkers, J.F., Wiegerinck, C.L., de Jonge, H.R., Bronsveld, I., Janssens, H.M., de Winter-de Groot, K.M., Brandsma, A.M., de Jong, N.W., Bijvelds, M.J., Scholte, B.J., et al. (2013). A functional CFTR assay using primary cystic fibrosis intestinal organoids. *Nat Med* 19, 939-945.

Fujino, N., Kubo, H., Ota, C., Suzuki, T., Suzuki, S., Yamada, M., Takahashi, T., He, M., Suzuki, T., Kondo, T., et al. (2012). A novel method for isolating individual cellular components from the adult human distal lung. *Am J Respir Cell Mol Biol* 46, 422-430.

Neuland, K., Sharma, N., and Frick, M. (2014). Synaptotagmin-7 links fusion-activated Ca<sup>2+</sup> entry and fusion pore dilation. *J Cell Sci* 127, 5218-5227.

Okita, K., Matsumura, Y., Sato, Y., Okada, A., Morizane, A., Okamoto, S., Hong, H., Nakagawa, M., Tanabe, K., Tezuka, K., et al. (2011). A more efficient method to generate integration-free human iPS cells. *Nat Methods* 8, 409-412.
